# Supplementary material for: Outcomes and drivers of inappropriate dosing of non-vitamin K antagonist oral anticoagulants (NOACs) in patients with atrial fibrillation: a systematic review and meta-analysis
Source: PubMed Central journal article supplement — Heart. 2022 Oct 31;109(3):178–85. doi: 10.1136/heartjnl-2022-321114 (PMC9872251; doi:10.1136/heartjnl-2022-321114), 2022-10-31
Supplement: heartjnl-2022-321114supp001.pdf [file heartjnl-2022-321114supp001.pdf]

# Supporting information

## Contents

|                                              |    |
|----------------------------------------------|----|
| S1. Search strategy.....                     | 2  |
| Database search strategy.....                | 2  |
| MEDLINE.....                                 | 2  |
| Embase .....                                 | 2  |
| Cochrane library .....                       | 3  |
| International Pharmaceutical Abstracts ..... | 3  |
| PubMed (e-pubs only).....                    | 4  |
| NHS EEDs.....                                | 4  |
| Econlit.....                                 | 4  |
| Web searching strategy .....                 | 5  |
| Conference searching strategy.....           | 6  |
| Embase.....                                  | 6  |
| CPCI-S.....                                  | 6  |
| Further conference searches .....            | 7  |
| S2. Study characteristics.....               | 8  |
| S3. Supplementary figures .....              | 20 |
| S4. Supplementary analysis.....              | 23 |
| S5. Additional study details .....           | 26 |

## S1. Search strategy

### Database search strategy

#### MEDLINE

Table 1: MEDLINE search strategy

| Search strings |                                                                                                                                                                                                      |
|----------------|------------------------------------------------------------------------------------------------------------------------------------------------------------------------------------------------------|
| 1              | Atrial Fibrillation/                                                                                                                                                                                 |
| 2              | ((atrial* or atrium or auricular*) adj3 (fibrillat* or flutter*)).ti,ab,kw,kf,ot.                                                                                                                    |
| 3              | NVAF.ti,ab,kw,kf,ot.                                                                                                                                                                                 |
| 4              | 1 or 2 or 3                                                                                                                                                                                          |
| 5              | (Apixaban* or Apixabanum* or Eliques* or Eliquis* or BMS 562247 or BMS-562247 or BMS562247 or 3Z9Y7UWC1J or 503612-47-3).ti,ab,kf,rn,nm.                                                             |
| 6              | Dabigatran/                                                                                                                                                                                          |
| 7              | (Dabigatran* or Pradaxa* or BIBR 953 or BIBR-953 or BIBR953 or I0VM4M70GC or 211914-51-1).ti,ab,kf,rn,nm.                                                                                            |
| 8              | Rivaroxaban/                                                                                                                                                                                         |
| 9              | (Rivaroxaban* or Xarelto* or BAY 59-7939 or BAY 597939 or BAY59-7939 or BAY597939 or BAY-59-7939 or BAY59-7939 or JNJ-39039039 or JNJ39039039 or 9NDF7JZ4M3 or 366789-02-8).ti,ab,kf,rn,nm.          |
| 10             | (Edoxaban* or Endoxaban* or Lixiana* or Roteas* or Savaysa* or DU 176 or DU-176 or DU176 or DU 176b or DU-176b or DU176b or NDU3J18APO or 480449-70-5 or 480449-71-6 or 912273-65-5).ti,ab,kf,rn,nm. |
| 11             | (oral* adj2 anticoagulant*).ti,ab,kf,rn,nm. Or *Anticoagulants/ad, ae, pk, pd                                                                                                                        |
| 12             | (direct oral anticoagulant* or direct-acting oral anticoagulant* or (DOAC or DOACs)).ti,ab,kf,rn,nm.                                                                                                 |
| 13             | (Novel Oral Anticoagulant* or New Oral Anticoagulant* or (NOAC or NOACs)).ti,ab,kf,rn,nm.                                                                                                            |
| 14             | 5 or 6 or 7 or 8 or 9 or 10 or 11 or 12 or 13                                                                                                                                                        |
| 15             | Inappropriate Prescribing/                                                                                                                                                                           |
| 16             | (dos* or overdosing or underdosing or level*1 or non-recommended or unconventional or off label or (label adj1 adherence)).ti,ab,ot,kw,kf.                                                           |
| 17             | *Dose-Response Relationship, Drug/                                                                                                                                                                   |
| 18             | 15 or 16 or 17                                                                                                                                                                                       |
| 19             | (2008* or 2009* or 2010* or 2011* or 2012* or 2013* or 2014* or 2015* or 2016* or 2017* or 2018* or 2019* or 2020*).ed,dc,dp,ep,vd,yr.                                                               |
| 20             | 4 and 14 and 18 and 19                                                                                                                                                                               |

#### Embase

Table 2: Embase search strategy

| Search strings |                                                                                                                                                                                                                     |
|----------------|---------------------------------------------------------------------------------------------------------------------------------------------------------------------------------------------------------------------|
| 1              | *atrial fibrillation/                                                                                                                                                                                               |
| 2              | ((atrial* or atrium or auricular*) adj3 (fibrillat* or flutter*)).ti,ab,kw,ot                                                                                                                                       |
| 3              | NVAF.ti,ab,kw,ot.                                                                                                                                                                                                   |
| 4              | 1 or 2 or 3                                                                                                                                                                                                         |
| 5              | apixaban/                                                                                                                                                                                                           |
| 6              | (Apixaban* or Apixabanum* or Eliques* or Eliquis* or BMS 562247 or BMS-562247 or BMS562247 or 3Z9Y7UWC1J or 503612-47-3).ti,ab,kw,rn,tn,dq,dy,cn                                                                    |
| 7              | dabigatran/                                                                                                                                                                                                         |
| 8              | (Dabigatran* or Pradaxa* or BIBR 953 or BIBR-953 or BIBR953 or I0VM4M70GC or 211914-51-1).ti,ab,kw,rn,tn,dq,dy,cn.                                                                                                  |
| 9              | rivaroxaban/                                                                                                                                                                                                        |
| 10             | (Rivaroxaban* or Xarelto* or BAY 59-7939 or BAY 597939 or BAY59-7939 or BAY597939 or BAY-59-7939 or BAY59-7939 or BAY-59-7939 or JNJ-39039039 or JNJ39039039 or 9NDF7JZ4M3 or 366789-02-8).ti,ab,kw,rn,tn,dq,dy,cn. |
| 11             | edoxaban/                                                                                                                                                                                                           |

|    |                                                                                                                                                                                                              |
|----|--------------------------------------------------------------------------------------------------------------------------------------------------------------------------------------------------------------|
| 12 | Edoxaban* or Endoxaban* or Lixiana* or Roteas* or Savaysa* or DU 176 or DU-176 or DU176 or DU 176b or DU-176b or DU176b or NDU3J18APO or 480449-70-5 or 480449-71-6 or 912273-65-5).ti,ab,kw, rn,tn,dq,dy,cn |
| 13 | (oral* adj2 anticoagulant*).ti,ab,kw, rn,tn,dq,dy,cn                                                                                                                                                         |
| 14 | *anticoagulant agent/                                                                                                                                                                                        |
| 15 | (direct oral anticoagulant* or direct-acting oral anticoagulant* or (DOAC or DOACs)).ti,ab,kw, rn,tn,dq,dy,cn                                                                                                |
| 16 | (Novel Oral Anticoagulant* or New Oral Anticoagulant* or (NOAC or NOACs)).ti,ab,kw, rn,tn,dq,dy,cn                                                                                                           |
| 17 | 5 or 6 or 7 or 8 or 9 or 10 or 11 or 12 or 13 or 14 or 15 or 16                                                                                                                                              |
| 18 | *inappropriate prescribing/                                                                                                                                                                                  |
| 19 | (dos* or overdosing or underdosing or level*1 or non-recommended or unconventional or off label or (label adj1 adherence)).ti,ab,ot,kw.                                                                      |
| 20 | *dose response/                                                                                                                                                                                              |
| 21 | 18 or 19 or 20                                                                                                                                                                                               |
| 22 | (2008* or 2009* or 2010* or 2011* or 2012* or 2013* or 2014* or 2015* or 2016* or 2017* or 2018* or 2019* or 2020*).yr.                                                                                      |
| 23 | 4 and 17 and 21 and 22                                                                                                                                                                                       |
| 24 | (conference abstract or conference review).pt.                                                                                                                                                               |
| 25 | 23 not 24                                                                                                                                                                                                    |
| 26 | limit 25 to embase                                                                                                                                                                                           |

## Cochrane library

Table 3: Cochrane library search strategy

| Search strings |                                                                                                                                                                                                            |
|----------------|------------------------------------------------------------------------------------------------------------------------------------------------------------------------------------------------------------|
| 1              | MeSH descriptor: [Atrial Fibrillation] this term only                                                                                                                                                      |
| 2              | ((atrial* or atrium or auricular*) NEAR/3 (fibrillat* or flutter*)):ti,ab                                                                                                                                  |
| 3              | NVAF:ti,ab                                                                                                                                                                                                 |
| 4              | #1 or #2 or #3                                                                                                                                                                                             |
| 5              | (Apixaban* or Apixabanum* or Eliques* or Eliquis* or "BMS 562247" or "BMS-562247" or BMS562247 or 3Z9Y7UWC1J or "503612-47-3"):ti,ab                                                                       |
| 6              | MeSH descriptor: [Dabigatran] this term only                                                                                                                                                               |
| 7              | (Dabigatran* or Pradaxa* or BIBR 953 or "BIBR-953" or BIBR953 or I0VM4M70GC or "211914-51-1"):ti,ab                                                                                                        |
| 8              | MeSH descriptor: [Rivaroxaban] this term only                                                                                                                                                              |
| 9              | (Rivaroxaban* or Xarelto* or "BAY 59-7939" or "BAY 597939" or "BAY59-7939" or BAY597939 or "BAY-59-7939" or "BAY59-7939" or "JNJ-39039039" or "JNJ39039039" or 9NDF7JZ4M3 or "366789-02-8"):ti,ab          |
| 10             | (Edoxaban* or Endoxaban* or Lixiana* or Roteas* or Savaysa* or "DU 176" or "DU-176" or "DU176" or "DU 176b" or "DU-176b" or DU176b or NDU3J18APO or "480449-70-5" or "480449-71-6" or "912273-65-5"):ti,ab |
| 11             | (oral* NEAR/2 anticoagulant*):ti,ab                                                                                                                                                                        |
| 12             | (direct oral anticoagulant* or direct-acting oral anticoagulant* or (DOAC or DOACs)):ti,ab                                                                                                                 |
| 13             | (Novel Oral Anticoagulant* or New Oral Anticoagulant* or (NOAC or NOACs)):ti,ab                                                                                                                            |
| 14             | #5 or #6 or #7 or #8 or #9 or #10 or #11 or #12 or #13                                                                                                                                                     |
| 15             | MeSH descriptor: [Inappropriate Prescribing] this term only                                                                                                                                                |
| 16             | (dos* or overdosing or underdosing or level* or non-recommended or unconventional or off label or (label near/1 adherence)):ti,ab                                                                          |
| 17             | #15 or #16                                                                                                                                                                                                 |
| 18             | #4 and #14 and #17                                                                                                                                                                                         |

NB: reviews were selected manually by date of publication 2008-2020.

## International Pharmaceutical Abstracts

Table 4: International pharmaceutical abstracts search strategy

| Search strings |                                                                            |
|----------------|----------------------------------------------------------------------------|
| 1              | Atrial Fibrillation/                                                       |
| 2              | ((atrial* or atrium or auricular*) adj3 (fibrillat\$ or flutter\$)).ti,ab. |
| 3              | NVAF.ti,ab.                                                                |
| 4              | 1 or 2 or 3                                                                |
| 5              | Apixaban/                                                                  |

|    |                                                                                                                                                                                                   |
|----|---------------------------------------------------------------------------------------------------------------------------------------------------------------------------------------------------|
| 6  | (Apixaban* or Apixabanum* or Eliques* or Eliquis* or BMS 562247 or BMS-562247 or BMS562247 or 3Z9Y7UWC1J or 503612-47-3).ti,ab.                                                                   |
| 7  | Dabigatran/                                                                                                                                                                                       |
| 8  | (Dabigatran* or Pradaxa* or BIBR 953 or BIBR-953 or BIBR953 or I0VM4M70GC or 211914-51-1).ti,ab.                                                                                                  |
| 9  | Rivaroxaban/                                                                                                                                                                                      |
| 10 | (Rivaroxaban* or Xarelto* or BAY 59-7939 or BAY 597939 or BAY59-7939 or BAY597939 or BAY-59-7939 or BAY59-7939 or BAY-59-7939 or JNJ-39039039 or JNJ39039039 or 9NDF7JZ4M3 or 366789-02-8).ti,ab. |
| 11 | Edoxaban/                                                                                                                                                                                         |
| 12 | (Edoxaban* or Endoxaban* or Lixiana* or Roteas* or Savaysa* or DU 176 or DU-176 or DU176 or DU 176b or DU-176b or DU176b or NDU3J18APO or 480449-70-5 or 480449-71-6 or 912273-65-5).ti,ab.       |
| 13 | (oral* adj2 anticoagulant*).ti,ab.                                                                                                                                                                |
| 14 | (direct oral anticoagulant* or direct-acting oral anticoagulant* or (DOAC or DOACs)).ti,ab.                                                                                                       |
| 15 | (Novel Oral Anticoagulant* or New Oral Anticoagulant* or (NOAC or NOACs)).ti,ab.                                                                                                                  |
| 16 | 5 or 6 or 7 or 8 or 9 or 10 or 11 or 12 or 13 or 14 or 15                                                                                                                                         |
| 17 | (dos* or overdosing or underdosing or level*1 or non-recommended or unconventional or off label or (label adj1 adherence)).ti,ab.                                                                 |
| 18 | (2008* or 2009* or 2010* or 2011* or 2012* or 2013* or 2014* or 2015* or 2016* or 2017* or 2018* or 2019* or 2020*).yr.                                                                           |
| 19 | 4 and 16 and 17 and 18                                                                                                                                                                            |

## PubMed (e-pubs only)

Table 5: PubMed search strategy

| Search number | Query                                                                                                   | Search Details                                                                                                                                                                                       |
|---------------|---------------------------------------------------------------------------------------------------------|------------------------------------------------------------------------------------------------------------------------------------------------------------------------------------------------------|
| 4             | #1 AND #2                                                                                               | "atrial fibrillation"[Title/Abstract] AND "Anticoagulants"[Title/Abstract] AND "dose"[Title/Abstract] AND ("pubstatusaheadofprint"[All Fields] OR "publisher"[Filter] OR "pubmednotmedline"[Filter]) |
| 3             | #1 AND #2                                                                                               | "atrial fibrillation"[Title/Abstract] AND "Anticoagulants"[Title/Abstract] AND "dose"[Title/Abstract] AND ("pubstatusaheadofprint"[All Fields] OR "publisher"[Filter] OR "pubmednotmedline"[Filter]) |
| 2             | "pubstatusaheadofprint"[All Fields] OR "publisher"[Filter] OR "pubmednotmedline"[Filter]                | "pubstatusaheadofprint"[All Fields] OR "publisher"[Filter] OR "pubmednotmedline"[Filter]                                                                                                             |
| 1             | ((Atrial Fibrillation[Title/Abstract] AND (Anticoagulants[Title/Abstract])) AND (dose[Title/Abstract])) | "atrial fibrillation"[Title/Abstract] AND "Anticoagulants"[Title/Abstract] AND "dose"[Title/Abstract]                                                                                                |

## NHS EEDs

Table 6: NHS EEDs search strategy

| Search strategy                                                                                                                                                                                   |
|---------------------------------------------------------------------------------------------------------------------------------------------------------------------------------------------------|
| (Atrial Fibrillation) AND (anticoagulant*) AND ((dos* or overdosing or underdosing or level* or non-recommended or unconventional or off label or (label adherence))) IN NHSEED FROM 2008 TO 2020 |
| NB: Searched in 'Any Field'                                                                                                                                                                       |

## Econlit

Table 7: Econlit search strategy

| Search strategy                                                                                                                                    |
|----------------------------------------------------------------------------------------------------------------------------------------------------|
| 1 TI ( ((atrial* or atrium or auricular*) N2 (fibrillat* or flutter*)) ) OR AB ( ((atrial* or atrium or auricular*) N2 (fibrillat* or flutter*)) ) |
| Limiters – Published Date: 20080101-20201231                                                                                                       |
| 2 TI NVAF AND AB NVAF                                                                                                                              |

## Web searching strategy

Table 8: Web searching strategy

| Database                                               | Search strategy                                                                                                                                                                                                                                                                                                                                                                                                                                                                                  |
|--------------------------------------------------------|--------------------------------------------------------------------------------------------------------------------------------------------------------------------------------------------------------------------------------------------------------------------------------------------------------------------------------------------------------------------------------------------------------------------------------------------------------------------------------------------------|
| Cost-Effectiveness Analysis (CEA) Registry             | Searched via <a href="http://healthconomicsdev.tuftsmedicalcenter.org/cear2/search/search.aspx">http://healthconomicsdev.tuftsmedicalcenter.org/cear2/search/search.aspx</a><br>The Methods search was use in basic search. The following search term was used:<br>1. Non-valvular atrial fibrillation                                                                                                                                                                                           |
| ScHARR HUD                                             | Searched via <a href="https://www.scharrhud.org/">https://www.scharrhud.org/</a><br>1. Atrial Fibrillation (any field)<br>2. (dos* or overdosing or underdosing or level* or non-recommended or unconventional or off label or (label adherence))<br>1. AND 2.                                                                                                                                                                                                                                   |
| EconPapers within Research Papers in Economics (RePEc) | Searched via <a href="https://econpapers.repec.org/">https://econpapers.repec.org/</a><br>1. Atrial Fibrillation AND anticoagulant* AND dos*<br>2. Non-valvular atrial fibrillation AND anticoagulant* AND Dos*<br>3. ((Atrial Fibrillation) AND (rivaroxaban OR Xarelto) AND (dos*))<br>4. ((Atrial Fibrillation) AND (dabigatran OR Pradaxa) AND (dos*))<br>5. ((Atrial Fibrillation) AND (apixaban OR Eliquis) AND (dos*))<br>6. ((Atrial Fibrillation) AND (edoxaban OR Lixiana) AND (dos*)) |

## Conference searching strategy

### Embase

Table 9: Embase conference searching strategy

| Search strings                                                                                                                                                                                                                                                                                                                                                                                                                                                                                                                                                                                                                                                                                                                                                                                                                                                                                                                                                                                                                                                                                                                                                                        |
|---------------------------------------------------------------------------------------------------------------------------------------------------------------------------------------------------------------------------------------------------------------------------------------------------------------------------------------------------------------------------------------------------------------------------------------------------------------------------------------------------------------------------------------------------------------------------------------------------------------------------------------------------------------------------------------------------------------------------------------------------------------------------------------------------------------------------------------------------------------------------------------------------------------------------------------------------------------------------------------------------------------------------------------------------------------------------------------------------------------------------------------------------------------------------------------|
| 1 *atrial fibrillation/<br>2 ((atrial* or atrium or auricular*) adj3 (fibrillat* or flutter*)).ti,ab,kw,ot.<br>3 NVAF.ti,ab,kw,ot.<br>4 1 or 2 or 3                                                                                                                                                                                                                                                                                                                                                                                                                                                                                                                                                                                                                                                                                                                                                                                                                                                                                                                                                                                                                                   |
| 5 apixaban/<br>6 (Apixaban* or Apixabanum* or Eliques* or Eliquis* or BMS 562247 or BMS-562247 or BMS562247 or 3Z9Y7UWC1J or 503612-47-3).ti,ab,kw,rn,tn,dq,dy,cn.<br>7 dabigatran/<br>8 (Dabigatran* or Pradaxa* or BIBR 953 or BIBR-953 or BIBR953 or I0VM4M70GC or 211914-51-1).ti,ab,kw,rn,tn,dq,dy,cn.<br>9 rivaroxaban/<br>10 (Rivaroxaban* or Xarelto* or BAY 59-7939 or BAY 597939 or BAY59-7939 or BAY597939 or BAY-59-7939 or BAY59-7939 or BAY-59-7939 or JNJ-39039039 or JNJ39039039 or 9NDF7JZ4M3 or 366789-02-8).ti,ab,kw,rn,tn,dq,dy,cn.<br>11 edoxaban/<br>12 (Edoxaban* or Endoxaban* or Lixiana* or Roteas* or Savaysa* or DU 176 or DU-176 or DU176 or DU 176b or DU-176b or DU176b or NDU3J18APO or 480449-70-5 or 480449-71-6 or 912273-65-5).ti,ab,kw,rn,tn,dq,dy,cn.<br>13 (oral* adj2 anticoagulant*).ti,ab,kw,rn,tn,dq,dy,cn.<br>14 *anticoagulant agent/<br>15 (direct oral anticoagulant* or direct-acting oral anticoagulant* or (DOAC or DOACs)).ti,ab,kw,rn,tn,dq,dy,cn.<br>16 (Novel Oral Anticoagulant* or New Oral Anticoagulant* or (NOAC or NOACs)).ti,ab,kw,rn,tn,dq,dy,cn.<br>17 5 or 6 or 7 or 8 or 9 or 10 or 11 or 12 or 13 or 14 or 15 or 16 |
| 18 *inappropriate prescribing/<br>19 (dos* or overdosing or underdosing or level*1 or non-recommended or unconventional or off label or (label adj1 adherence)).ti,ab,ot,kw.<br>20 *dose response/<br>21 18 or 19 or 20                                                                                                                                                                                                                                                                                                                                                                                                                                                                                                                                                                                                                                                                                                                                                                                                                                                                                                                                                               |
| 22 (conference abstract or conference review).pt.<br>23 4 and 17 and 21 and 22                                                                                                                                                                                                                                                                                                                                                                                                                                                                                                                                                                                                                                                                                                                                                                                                                                                                                                                                                                                                                                                                                                        |
| 24 (2018* or 2019* or 2020*).yr.                                                                                                                                                                                                                                                                                                                                                                                                                                                                                                                                                                                                                                                                                                                                                                                                                                                                                                                                                                                                                                                                                                                                                      |
| 25 23 and 24                                                                                                                                                                                                                                                                                                                                                                                                                                                                                                                                                                                                                                                                                                                                                                                                                                                                                                                                                                                                                                                                                                                                                                          |

### CPCI-S

Table 10: CPCI-S conference searching strategy

| Search strings                                                                                                                                                                                                                                                                                                                                                                                                                                                                                                                                                                                                                                                                                                                                                   |
|------------------------------------------------------------------------------------------------------------------------------------------------------------------------------------------------------------------------------------------------------------------------------------------------------------------------------------------------------------------------------------------------------------------------------------------------------------------------------------------------------------------------------------------------------------------------------------------------------------------------------------------------------------------------------------------------------------------------------------------------------------------|
| 1 (((atrial* or atrium or auricular*) NEAR/2 (fibrillat* or flutter*)))<br>2 (NVAF)<br>3 #2 OR #1                                                                                                                                                                                                                                                                                                                                                                                                                                                                                                                                                                                                                                                                |
| 4 ((Apixaban* or Apixabanum* or Eliques* or Eliquis* or BMS 562247 or BMS-562247 or BMS562247 or 3Z9Y7UWC1J or 503612-47-3) )<br>5 ((Dabigatran* or Pradaxa* or BIBR 953 or BIBR-953 or BIBR953 or I0VM4M70GC or 211914-51-1) )<br>6 ((Rivaroxaban* or Xarelto* or BAY 59-7939 or BAY 597939 or BAY59-7939 or BAY597939 or BAY-59-7939 or BAY59-7939 or BAY-59-7939 or JNJ-39039039 or JNJ39039039 or 9NDF7JZ4M3 or 366789-02-8) )<br>7 ((Edoxaban* or Endoxaban* or Lixiana* or Roteas* or Savaysa* or DU 176 or DU-176 or DU176 or DU 176b or DU-176b or DU176b or NDU3J18APO or 480449-70-5 or 480449-71-6 or 912273-65-5) )<br>8 ((oral* NEAR/3 anticoagulant* )<br>9 ((direct oral anticoagulant* or direct-acting oral anticoagulant* or (DOAC or DOACs) ) |

|                                                                                                                                     |
|-------------------------------------------------------------------------------------------------------------------------------------|
| 10 ((Novel Oral Anticoagulant* or New Oral Anticoagulant* or (NOAC or NOACs) ))                                                     |
| 11 #10 OR #9 OR #8 OR #7 OR #6 OR #5 OR #4                                                                                          |
| 12 (Inappropriate Prescribing)                                                                                                      |
| 13 ((dos* or overdosing or underdosing or level*1 or non-recommended or unconventional or off label or (label NEAR/2 adherence) ).) |
| 14 #13 OR #12                                                                                                                       |
| 15 #14 AND #11 AND #3                                                                                                               |
| 16 #14 AND #11 AND #3                                                                                                               |
| <b>Refined by: PUBLICATION YEARS: ( 2020 OR 2019 OR 2018 )</b>                                                                      |

NB: *Indexes=CPCI-S Timespan=All years*

### Further conference searches

Table 11: Further conference search strategy

| Conference                                  | Search strategy                                                                                                                                                                                                                                                                                                                                                                                                                                                                                                                                                                                                                                                                                                                                                                                                                                                                                              |
|---------------------------------------------|--------------------------------------------------------------------------------------------------------------------------------------------------------------------------------------------------------------------------------------------------------------------------------------------------------------------------------------------------------------------------------------------------------------------------------------------------------------------------------------------------------------------------------------------------------------------------------------------------------------------------------------------------------------------------------------------------------------------------------------------------------------------------------------------------------------------------------------------------------------------------------------------------------------|
| <b>European Society of Cardiology (ESC)</b> | Handsearched w/c 18 <sup>th</sup> October 2020<br>Abstracts and posters were searched via the ESC 365 library: <a href="https://esc365.escardio.org/Search-Results?vnextkeyword=">https://esc365.escardio.org/Search-Results?vnextkeyword=</a><br>The handsearched focused on the inclusion criteria for the review, namely: patients with NVAf and inappropriate dosing.                                                                                                                                                                                                                                                                                                                                                                                                                                                                                                                                    |
| <b>American College of Cardiology (ACC)</b> | Handsearched w/c 18 <sup>th</sup> October 2020<br>Abstracts and posters were handsearched via journal as below and then a keyword search was made using the journal interface and a google advanced search.<br>2020: <a href="https://www.onlinejacc.org/content/75/11_Supplement_1">https://www.onlinejacc.org/content/75/11_Supplement_1</a><br>2019: <a href="https://www.onlinejacc.org/content/73/9_Supplement_1">https://www.onlinejacc.org/content/73/9_Supplement_1</a><br>2018: <a href="https://www.onlinejacc.org/content/71/11_Supplement">https://www.onlinejacc.org/content/71/11_Supplement</a><br>General resource: <a href="https://www.onlinejacc.org/content/meeting-abstract-supplements">https://www.onlinejacc.org/content/meeting-abstract-supplements</a><br>The handsearched focused on the inclusion criteria for the review, namely: patients with NVAf and inappropriate dosing. |
| <b>American Heart Association (AHA)</b>     | Handsearched w/c 18 <sup>th</sup> October 2020<br>via journal as below and then a keyword search was made using the journal interface.<br><br>2020: event scheduled for Nov 16 <sup>th</sup> (so outside date of search)<br>2019: <a href="https://www.ahajournals.org/toc/circ/140/Suppl_1">https://www.ahajournals.org/toc/circ/140/Suppl_1</a><br>2018: <a href="https://www.ahajournals.org/toc/circ/138/Suppl_1">https://www.ahajournals.org/toc/circ/138/Suppl_1</a><br><br>The handsearched focused on the inclusion criteria for the review, namely: patients with NVAf and inappropriate dosing.                                                                                                                                                                                                                                                                                                    |

## S2. Study characteristics

Table 12: Summary of study characteristics

| Author_year         | Study design    | Research question | Country        | Duration of follow-up                                                                           | Sample size | DOAC                   | Patient population                                                  | Outcomes/factors                                                                                                                                                                                                                  | NOS score (categorisation) |
|---------------------|-----------------|-------------------|----------------|-------------------------------------------------------------------------------------------------|-------------|------------------------|---------------------------------------------------------------------|-----------------------------------------------------------------------------------------------------------------------------------------------------------------------------------------------------------------------------------|----------------------------|
| Ablefoni_2019       | Cross-sectional | 3                 | Germany        | N/A                                                                                             | 378         | RIVA                   | Consecutive AF patients identified on Heart Centre Leipzig database | eGFR   age   concomitant antiplatelet therapy   HASBLED score   vascular disease   previous stent/PTCA                                                                                                                            | 6 (M)                      |
| Ahlert_2018         | Cross-sectional | 3                 | United Kingdom | N/A                                                                                             | 168         | APIX DABI<br>EDOX RIVA | Patients in cardiology ward with DOAC discharge prescriptions       | eGFR                                                                                                                                                                                                                              | 6 (M)                      |
| Ahmed_2020          | Cross-sectional | 3                 | United States  | N/A                                                                                             | 8576        | APIX DABI<br>RIVA      | AF patients treated at Mayo clinic with DOACs                       | Liver disease                                                                                                                                                                                                                     | 5 (M)                      |
| Akagi_2019          | Cohort          | 1                 | Japan          | until December 2014                                                                             | 701         | DABI                   | Patients starting dabigatran in study hospitals                     | Stroke/TIA/SE   major bleeding                                                                                                                                                                                                    | 5 (M)                      |
| Alali_2019          | Cohort          | 3                 | Saudi Arabia   | N/A                                                                                             | 151         | DABI                   | Patients receiving dabigatran in outpatient settings                | Age   CrCl   CHA2DS2-VASc score   HASBLED score   Previous heart failure   History of prior stroke   DM   Hypertension   Peripheral arterial disease   Upper GI bleed                                                             | 4 (M)                      |
| Alcuskay_2020       | Cohort          | 1                 | United States  | Median follow up apixaban: 137 (45, 326)   dabigatran 134 (44, 162)   rivaroxaban 139 (42, 374) | 21346       | APIX DABI<br>RIVA      | Nursing home residents aged >65 years                               | Stroke/TIA/SE   major bleeding   AMI/VTE/SE   Mortality                                                                                                                                                                           | 5 (M)                      |
| Altay_2017          | Cross-sectional | 3                 | Turkey         | N/A                                                                                             | 2862        | APIX DABI<br>RIVA      | Patients treated with DOAC at study centres                         | Age   Sex   Chronic renal failure   CHA2DS2-VASc score   HASBLED score   eGFR                                                                                                                                                     | 5 (M)                      |
| Amarenco_2018       | Cohort          | 1                 | International  | 1 year                                                                                          | 4464        | RIVA                   | NVAF patients >18 with known CrCl                                   | Stroke/SE/TIA/MI   Mortality   Major bleeding, stroke/non-CNS SE, or all-cause death (grouped outcome)   Major bleeding                                                                                                           | 6 (M)                      |
| Andrade_2018        | Cross-sectional | 3                 | Canada         | N/A                                                                                             | 831         | APIX DABI<br>EDOX RIVA | Patients with AF and CKD                                            | Use of modified diet in renal disease method to estimate glomerular filtration rate   Use of CKD-EPI to estimate glomerular filtration rate   Use of modified diet in renal disease method to estimate glomerular filtration rate | 5 (M)                      |
| AndreuCayuelas_2018 | Cross-sectional | 3                 | Spain          | 1 year                                                                                          | 692         | APIX DABI<br>RIVA      | AF patients commencing NOACs in study hospitals                     | Age   Sex   Weight   Haemoglobin   CHA2DS2-VASc score   Appropriate kidney function monitoring                                                                                                                                    | 8 (H)                      |
| AndreuCayuelas_2016 | Cohort          | 3                 | Spain          | 6 months                                                                                        | 162         | APIX DABI<br>RIVA      | Patients discharged from study hospital                             | CrCl                                                                                                                                                                                                                              | 4 (M)                      |



|                    |                 |   |                      |                                                                       |       |                       |                                                                           |                                                                                                                                                  |       |
|--------------------|-----------------|---|----------------------|-----------------------------------------------------------------------|-------|-----------------------|---------------------------------------------------------------------------|--------------------------------------------------------------------------------------------------------------------------------------------------|-------|
| Anouassi_2020      | Cross-sectional | 1 | United Arab Emirates | Median 241 days                                                       | 608   | APIX DABI RIVA        | NVAF patients receiving DOAC prescription from hospital pharmacy          | Ischaemic stroke   Major bleeding                                                                                                                | 3 (L) |
|                    |                 | 3 |                      |                                                                       |       |                       |                                                                           | Age   Weight   eGFR   History of major bleeding   CHA2DS2-VASc score   History of prior stroke                                                   | 2 (L) |
| Arbel_2019         | Cohort          | 1 | Israel               | Mean 23 months                                                        | 8425  | APIX DABI RIVA        | NVAF patients initiating DOAC therapy                                     | Mortality   Mortality, stroke and myocardial infarction (grouped outcome)   Ischaemic stroke   MI   Major bleeding                               | 7 (H) |
| Atallah_2020       | Cross-sectional | 3 | United Arab Emirates | Mean 400 days                                                         | 232   | APIX                  | Patients receiving apixaban from hospital pharmacy                        | Age   eGFR                                                                                                                                       | 6 (M) |
| Badreldin_2020     | Cohort          | 3 | Saudi Arabia         | Not recorded                                                          | 1271  | APIX                  | NVAF patients                                                             | Age   weight   History of minor bleed   CrCl   CHA2DS2-VASc score                                                                                | 5 (M) |
| Bando_2018         | Cross-sectional | 1 | Japan                | N/A                                                                   | 1339  | RIVA                  | NVAF patients                                                             | Cerebral infarction                                                                                                                              | 7 (H) |
| Sabbag_2018        | Cohort          | 1 | Israel               | Mean 2 years                                                          | 4523  | APIX RIVA             | AF patients with eGFR 15-60 ml/min                                        | Stroke/SE/death                                                                                                                                  | 4 (M) |
| Basaran_2016       | Cross-sectional | 3 | Turkey               | N/A                                                                   | 2086  | APIX DABI RIVA        | AF patients aged >18                                                      | Age   CHA2DS2-VASc score   HASBLED score   Hypertension   History of prior stroke   CrCl                                                         | 6 (M) |
| Belen_2015         | Cross-sectional | 3 | Turkey               | N/A                                                                   | 174   | DABI RIVA             | AF patients admitted to study hospital                                    | Age   CrCl   CHA2DS2-VASc score   HASBLED score   CHF   CAD   Hypertension   Cerebrovascular accident                                            | 4 (M) |
| Bosque Varela_2018 | Cross-sectional | 3 | Spain                | N/A                                                                   | 341   | DOACs (unclear which) | NVAF patients admitted to stroke unit                                     | Age   filtrate glomerular <50 ml/min/1.73m2 and/or creatinine 1.5 mg/dl                                                                          | 5 (M) |
| Briasoulis_2018    | Cross-sectional | 3 | United States        | N/A                                                                   | 51535 | DABI RIVA             | Newly diagnosed AF patients enrolled in Humana managed care organizations | Age Sex   History of prior stroke   Previous MI   History of major bleeding   Previous heart failure   Moderate to severe chronic kidney disease | 4 (M) |
| Briasoulis_2019    | Cross-sectional | 1 | United States        | N/A                                                                   | 55075 | DABI RIVA             | Newly diagnosed AF patients enrolled in Humana managed care organizations | Intracranial haemorrhage   Medication termination                                                                                                | 1 (L) |
|                    |                 | 3 |                      |                                                                       |       |                       |                                                                           | Age   Sex   Ethnicity   Weight   History of minor bleeding   Previous heart failure                                                              | 1 (L) |
| Briasoulis_2020    | Cohort          | 1 | United States        | Mean 13.9 months for patients eligible for low dose dabigatran   Mean | 27747 | DABI RIVA             | Medicare beneficiaries aged ≥65 with newly diagnosed NVAF                 | Ischaemic stroke   Major bleeding   Gastrointestinal hemorrhage   Intracranial hemorrhage                                                        | 8 (H) |

|               |                 |   |                  |                                                                                                                                                                                                         |       |                     |                                                               |                                                                                                                                                                                                                                                                                                                                                                                                             |       |
|---------------|-----------------|---|------------------|---------------------------------------------------------------------------------------------------------------------------------------------------------------------------------------------------------|-------|---------------------|---------------------------------------------------------------|-------------------------------------------------------------------------------------------------------------------------------------------------------------------------------------------------------------------------------------------------------------------------------------------------------------------------------------------------------------------------------------------------------------|-------|
|               |                 | 3 |                  | 15.1 months for patients eligible for standard dose dabigatran   Mean 10.1 months for patients eligible for low dose rivaroxaban   Mean 12.3 months for patients eligible for standard dose rivaroxaban |       |                     |                                                               | Age   Sex   Ethnicity   Weight   Smoking   History of prior stroke   History of major bleeding   DM   Previous MI   Liver disease   Previous heart failure   Hypertension   Ischemic cardiomyopathy   Pulmonary circulatory disease   COPD   Valve disease   no or mild renal disease   Moderate renal disease   Severe renal disease   transfusion from procedure   Revascularization   implantable device | 9 (H) |
| Brook_2019    | Cohort          | 1 | Australia        | Median 17 months                                                                                                                                                                                        | 658   | APIX DABI RIVA      | Patients on DOACs at study hospital                           | Major bleeding   Ischaemic stroke                                                                                                                                                                                                                                                                                                                                                                           | 5 (M) |
| Buchholz_2018 | Cross-sectional | 3 | Germany          | N/A                                                                                                                                                                                                     | 569   | APIX                | AF patients initiated on apixaban in 2016                     | Age   Weight   Serum Creatinine   CHA2DS2-VASc score   History of prior stroke   Coronary interventions                                                                                                                                                                                                                                                                                                     | 5 (M) |
| Camm_2020     | Cohort          | 1 | International    | 2 years                                                                                                                                                                                                 | 10426 | APIX DABI EDOX RIVA | AF patients aged $\geq 18$                                    | Mortality   Stroke/SE   Major bleeding                                                                                                                                                                                                                                                                                                                                                                      | 8 (H) |
|               |                 | 3 |                  |                                                                                                                                                                                                         |       |                     |                                                               | Age   Sex   Ethnicity   Weight   Acute coronary syndrome   Vascular Disease   History of prior stroke   DM   Moderate to severe chronic kidney disease                                                                                                                                                                                                                                                      | 8 (H) |
| Cardoso_2020  | Cross-sectional | 3 | Portugal         | N/A                                                                                                                                                                                                     | 858   | APIX DABI EDOX RIVA | NVAF patients                                                 | Chronic renal failure   Previous symptomatic haemorrhage   Sex                                                                                                                                                                                                                                                                                                                                              | 6 (M) |
| Chan_2020     | Cross-sectional | 1 | Taiwan           | N/A                                                                                                                                                                                                     | 11275 | APIX DABI EDOX RIVA | New onset AF patients aged $> 20$                             | Stroke/SE   Major bleeding                                                                                                                                                                                                                                                                                                                                                                                  | 7 (H) |
| Chao_2019     | Cross-sectional | 3 | Korea and Taiwan | N/A                                                                                                                                                                                                     | 2959  | EDOX                | NVAF patients                                                 | Age   CrCl   History of major bleed   History of prior stroke                                                                                                                                                                                                                                                                                                                                               | 4 (M) |
| Chao_2018     | Cohort          | 1 | Taiwan           | N/A                                                                                                                                                                                                     | 2124  | RIVA                | AF patients aged $\geq 20$ treated with RIVA                  | Ischaemic stroke   Intracranial haemorrhage   Stroke or intracranial haemorrhage                                                                                                                                                                                                                                                                                                                            | 6 (M) |
| Chao_2020     | Cohort          | 1 | International    | 1 year                                                                                                                                                                                                  | 26823 | EDOX                | N/A                                                           | Major bleeding   Stroke/SE   Non-major bleeding                                                                                                                                                                                                                                                                                                                                                             | 4 (M) |
|               |                 | 3 |                  |                                                                                                                                                                                                         |       |                     |                                                               | Age   CrCl   Comorbid conditions   History of major bleeding   History of prior stroke                                                                                                                                                                                                                                                                                                                      | 5 (M) |
| Cheng_2019    | Cohort          | 1 | Taiwan           | 2.1 years                                                                                                                                                                                               | 2214  | RIVA                | Chinese AF patients aged $\geq 20$ with eGFR $\geq 30$ ml/min | Ischaemic stroke   Intracranial haemorrhage   Stroke or intracranial haemorrhage                                                                                                                                                                                                                                                                                                                            | 8 (H) |
| Cho_2019      | Cross-sectional | 1 | Not recorded     | N/A                                                                                                                                                                                                     | 741   | NOACs               | NVAF patients with a CHA2DS2-VASc score of $\geq 2$           | NIHSS score   Modified Rankin Scale                                                                                                                                                                                                                                                                                                                                                                         | 4 (M) |
| Cho_2020      | Cohort          | 1 | Korea            | 15 months                                                                                                                                                                                               | 16568 | APIX RIVA           | NVAF patients newly prescribed NOACs or warfarin              | Stroke/SE   Mortality   Major bleeding                                                                                                                                                                                                                                                                                                                                                                      | 8 (H) |

|                 |                 |   |               |                                             |       |                        |                                                                                              |                                                                                                                                                                                                                                                                                                                                                                 |       |
|-----------------|-----------------|---|---------------|---------------------------------------------|-------|------------------------|----------------------------------------------------------------------------------------------|-----------------------------------------------------------------------------------------------------------------------------------------------------------------------------------------------------------------------------------------------------------------------------------------------------------------------------------------------------------------|-------|
| Choi_2020       | Cohort          | 3 | Korea         | 10.5 months                                 | 3445  | APIX DABI<br>RIVA      | NVAF patients aged ≥ 18 years                                                                | Chronic kidney disease                                                                                                                                                                                                                                                                                                                                          | 6 (M) |
| Davern_2019     | Cross-sectional | 1 | Ireland       | N/A                                         | 67    | NOAC                   | AF patients receiving OAC presenting with stroke                                             | Ischaemic stroke                                                                                                                                                                                                                                                                                                                                                | 4 (M) |
| Davis_2020      | Cohort          | 1 | United States | until OAC discontinuation or study end date | 91    | APIX DABI<br>EDOX RIVA | AF patients aged > 19 years received one dose of OAC                                         | Major and non-major bleeding                                                                                                                                                                                                                                                                                                                                    | 5 (M) |
| de Almeida_2020 | Cohort          | 1 | Portugal      | 1 year                                      | 327   | APIX DABI<br>RIVA      | Old and frail AF patients prescribed NOAC                                                    | Mortality   Stroke/SE/major bleeding                                                                                                                                                                                                                                                                                                                            | 6 (M) |
| de Groot_2020   | Cohort          | 1 | International | 1 year                                      | 13092 | EDOX                   | AF patients treated with edoxaban                                                            | Stroke/SE   major bleeding                                                                                                                                                                                                                                                                                                                                      | 6 (M) |
|                 |                 | 3 |               |                                             |       |                        |                                                                                              | Age   Sex   Weight   CHA2DS2-VASc score   HASBLED score   CrCl                                                                                                                                                                                                                                                                                                  | 7 (H) |
| Dennehy_2019    | Cross-sectional | 3 | Ireland       | N/A                                         | 68    | APIX DABI<br>RIVA      | AF patients eligible for DOAC prescription                                                   | Age   no or mild renal disease                                                                                                                                                                                                                                                                                                                                  | 4 (M) |
| Erdogan_2018    | Cross-sectional | 3 | Turkey        | N/A                                         | 295   | NOACs                  | AF patients aged between 60-99 years being treated with DOACs                                | Age   Weight   Frailty   Falling/falling-fear   Vascular disease                                                                                                                                                                                                                                                                                                | 4 (M) |
| Essien_2018     | Cohort          | 3 | United States | 12-24 months                                | 13404 | DOACs                  | AF patients aged ≥ 21 years                                                                  | Ethnicity                                                                                                                                                                                                                                                                                                                                                       | 6 (M) |
| Franchi_2018    | Cross-sectional | 3 | Italy         | N/A                                         | 328   | APIX DABI<br>EDOX RIVA | AF patients aged ≥ 65 years                                                                  | Weight   Falling/falling-fear   Vascular disease   Liver disease   Percutaneous transluminal coronary angioplasty/coronary artery bypass graft                                                                                                                                                                                                                  | 5 (M) |
| Gibson_2018     | Cross-sectional | 1 | United States | N/A                                         | 556   | APIX                   | NVAF or atrial flutter with patients aged ≥ 18 years receiving at least one dose of apixaban | Major bleeding   Non-major bleeding                                                                                                                                                                                                                                                                                                                             | 4 (M) |
|                 |                 | 3 |               |                                             |       |                        |                                                                                              | Age   Weight   Serum creatinine                                                                                                                                                                                                                                                                                                                                 | 5 (M) |
| Godino_2020     | Cohort          | 1 | Italy         | 2 years                                     | 760   | APIX DABI<br>EDOX RIVA | NVAF patients treated with NOAC for 3 months                                                 | Stroke/SE/TIA/MI   Ischaemic stroke   Stroke/TIA   Ischemic stroke with haemorrhage   TIA   Myocardial infarction   SE   Major and non-major bleeding   Major bleeding   Major bleeding (fatal bleeding)   Intracranial haemorrhage   Mortality (all-cause mortality; cardiac death; bleeding death   cancer death and other)   Thromboembolic events e/o death | 6 (M) |
|                 |                 | 3 |               |                                             |       |                        |                                                                                              | Age   Weight   Sex   CrCl   Hypertension   DM   COPD   Peripheral vascular disease   Prior stroke/TIA/SE   Chronic heart failure   Previous bleed   Prior AMI   bioprosthetic                                                                                                                                                                                   | 6 (M) |

|                         |                 |   |               |              |       |                        |                                                                            |                                                                                                                                                                                                                                                                                                                                                                                                                                                                                                                                                                                              |       |
|-------------------------|-----------------|---|---------------|--------------|-------|------------------------|----------------------------------------------------------------------------|----------------------------------------------------------------------------------------------------------------------------------------------------------------------------------------------------------------------------------------------------------------------------------------------------------------------------------------------------------------------------------------------------------------------------------------------------------------------------------------------------------------------------------------------------------------------------------------------|-------|
|                         |                 |   |               |              |       |                        |                                                                            | heart valve   CHA2DS2-VASc score   HASBLED score                                                                                                                                                                                                                                                                                                                                                                                                                                                                                                                                             |       |
| Goena_2019              | Cross-sectional | 3 | Spain         | 521 days     | 373   | APIX DABI<br>EDOX RIVA | NVAF patients treated with NOAC for stroke prevention                      | Frailty   History of major bleeding                                                                                                                                                                                                                                                                                                                                                                                                                                                                                                                                                          | 3 (L) |
| Gomez<br>Lumbreras_2018 | Cohort          | 3 | Spain         | 1 year       | 6135  | APIX                   | NVAF patients prescribed apixaban during study period                      | Treatment naïve                                                                                                                                                                                                                                                                                                                                                                                                                                                                                                                                                                              | 7 (H) |
| Gronich_2020            | Cohort          | 1 | Israel        | Through 2018 | 27765 | APIX                   | Apixaban users with AF diagnosis starting apixaban during the study period | Major bleeding   Ischaemic stroke                                                                                                                                                                                                                                                                                                                                                                                                                                                                                                                                                            | 7 (H) |
| Gustafson_2019          | Cohort          | 1 | United States | 90 days      | 249   | APIX DABI<br>RIVA      | Adult NVAF patients discharged with DOAC prescription                      | Bleeding/thromboembolism/mortality (grouped outcome)   Major and non-major bleeding   Thromboembolism   Mortality                                                                                                                                                                                                                                                                                                                                                                                                                                                                            | 5 (M) |
|                         |                 | 3 |               |              |       |                        |                                                                            | Age   Ethnicity   Sex   Weight   CrCl   Serum creatinine   CHA2DS2-VASc score   Child-Pugh class                                                                                                                                                                                                                                                                                                                                                                                                                                                                                             | 6 (M) |
| Hirsh Raccach_2019      | Cross-sectional | 3 | Israel        | N/A          | 143   | APIX DABI<br>RIVA      | AF patients aged ≥ 21 years                                                | Age   Sex   Weight   CrCl   Smoking   Serum Creatinine   Hypertension   Hyperlipidemia   CHF   Ischemic heart disease   DM   Chronic renal failure   Cerebrovascular accident                                                                                                                                                                                                                                                                                                                                                                                                                | 4 (M) |
| Ikeda_2019              | Cohort          | 1 | Japan         | 1 year       | 6521  | RIVA                   | NVAF patients with CrCl ≥ 50ml/min starting rivaroxaban                    | Major and non-major bleeding (any bleeding)   Major bleeding ((Major bleeding was defined as the International Society of Thrombosis and Haemostasis (ISTH) criteria)   Major bleeding (fatal bleeding)   Major bleeding (critical organ bleeding)   Major bleeding (intracranial bleeding)   Major bleeding (Haemoglobin decrease ≥2 g/dL)   Major bleeding (Transfusion of ≥ 2 units of packed RBC or whole blood)   Stroke/SE/MI (Stroke/non-CNS SE/MI)   Ischaemic stroke   Haemorrhagic stroke   SE (non-CNS SE)   Myocardial Infarction   Stroke/SE/MI (Ischemic stroke/non-CNS SE/MI) | 5 (M) |
|                         |                 | 3 |               |              |       |                        |                                                                            | Age   Sex   Weight   Serum creatinine   CrCl   CHA2DS2-VASc score   CHADS2   HASBLED score   CHF   Hypertension   DM   Stroke/TIA   Vascular disease                                                                                                                                                                                                                                                                                                                                                                                                                                         | 6 (M) |
| Inohara_2019            | Cohort          | 1 | United States | 2 years      | 6682  | APIX DABI<br>EDOX RIVA | AF patients aged ≥ 21 years                                                | Myocardial infarction   Stroke/TIA   Heart Failure   Major bleeding   Mortality (CV death)   Major adverse cardiovascular and neurological event                                                                                                                                                                                                                                                                                                                                                                                                                                             | 6 (M) |

|             |                 |   |                 |           |                   |                     |                                                                                                                 |                                                                                                                                                                                                                                                                                                                                                                                                                   |       |
|-------------|-----------------|---|-----------------|-----------|-------------------|---------------------|-----------------------------------------------------------------------------------------------------------------|-------------------------------------------------------------------------------------------------------------------------------------------------------------------------------------------------------------------------------------------------------------------------------------------------------------------------------------------------------------------------------------------------------------------|-------|
| Inoue_2019  | Cohort          | 1 | Japan           | 460 days  | 6443              | DABI                | NVAF patients newly initiated dabigatran treatment for prevention of ischemic stroke and SE                     | Major bleeding   Intracranial haemorrhage   Gastrointestinal haemorrhage   stroke/TIA/SE   Ischaemic stroke   Haemorrhagic stroke   TIA   SE   Mortality   stroke/TIA/SE/major bleeding/death                                                                                                                                                                                                                     | 5 (M) |
|             |                 | 3 |                 |           |                   |                     |                                                                                                                 | Age   Sex   Weight   CHF   DM   Hypertension   History prior stroke   Hepatic disorder   Upper GI bleeding   GI disorder   Serum creatinine   CrCl   CHA2DS2-VASc score   CHADS2   HASBLED score                                                                                                                                                                                                                  | 5 (M) |
| Inoue_2020  | Cohort          | 1 | Japan           | 104 weeks | 6306              | APIX                | NVAF patients newly initiated apixaban for prevention of thromboembolism                                        | Major and non-major bleeding (any haemorrhage)   Major bleeding   Intracranial haemorrhage   Intracranial haemorrhage (cerebral haemorrhage; subarachnoid haemorrhage and chronic subdural haemorrhage)   Bleeding ( other haemorrhage)   Gastrointestinal haemorrhage   Stroke/TIA/SE   Ischaemic stroke   Ischaemic stroke (atherothrombotic stroke; cardioembolic stroke; Lacunar stroke and other)   SE   TIA | 7 (H) |
|             |                 | 3 |                 |           |                   |                     |                                                                                                                 | Age   Sex   Weight   Creatinine   CrCl   CHA2DS2-VASc Score   CHADS2   HASBLED score   Haemorrhage (clinically relevant haemorrhage and haemorrhagic disease)   GI ulcer   History of prior stroke   Hypertension   CHF   DM   Renal disease   Liver disease                                                                                                                                                      | 7 (H) |
| Jacobs_2019 | Cohort          | 3 | The Netherlands | N/A       | 3231              | APIX DABI RIVA      | AF patients prescribed NOAC                                                                                     | Age   Sex   Weight   HASBLED score   Renal function                                                                                                                                                                                                                                                                                                                                                               | 6 (M) |
| Jeong_2020  | Cohort          | 1 | Korea           | 1 year    | 2208              | RIVA                | NVAF patients                                                                                                   | Stroke/SE   Stroke/SE/major bleeding/death (grouped)   stroke/systemic embolism/major bleeding                                                                                                                                                                                                                                                                                                                    | 5 (M) |
| Jones_2020  | Cohort          | 1 | United States   | N/A       | 340               | APIX                | NVAF patients aged ≥ 18 years receiving apixaban                                                                | Major bleeding   Non-major bleeding                                                                                                                                                                                                                                                                                                                                                                               | 4 (M) |
| Jung_2018   | Cross-sectional | 1 | Korea           | N/A       | 858 (70 on NOACs) | APIX DABI EDOX RIVA | Consecutive NVAF patients suffering acute ischaemic stroke or TIA within 7 days and admitted to study hospitals | Favourable outcome (mRS) (Ischaemic stroke)                                                                                                                                                                                                                                                                                                                                                                       | 4 (M) |
|             |                 | 3 |                 |           |                   |                     |                                                                                                                 | Age   Sex   Smoking   CHF   Hypertension   DM   Hyperlipidemia   Ischemic heart disease   Peripheral arterial disease   History of prior stroke   CHA2DS2-VASc score   CE on the TOAST classification   INR   CrCl                                                                                                                                                                                                | 4 (M) |

|               |                 |   |         |            |                           |                        |                                                                   |                                                                                                                                                                                                                                                                                                                                                                                                         |       |
|---------------|-----------------|---|---------|------------|---------------------------|------------------------|-------------------------------------------------------------------|---------------------------------------------------------------------------------------------------------------------------------------------------------------------------------------------------------------------------------------------------------------------------------------------------------------------------------------------------------------------------------------------------------|-------|
| Kartas_2019   | Cross-sectional | 3 | Greece  | N/A        | 768                       | APIX DABI<br>RIVA      | NVAF or atrial flutter patients aged ≥ 18 years                   | Age   History of prior stroke   History of major bleeding   Previous heart failure   CHA2DS2-VASc score   HASBLED score   CrCl                                                                                                                                                                                                                                                                          | 4 (M) |
| Kato_2018     | Cross-sectional | 1 | Japan   | N/A        | 53                        | APIX DABI<br>EDOX RIVA | NVAF patients treated with DOACs before onset of stroke           | Ischaemic stroke                                                                                                                                                                                                                                                                                                                                                                                        | 4 (M) |
|               |                 | 3 |         |            |                           |                        |                                                                   | Age   Sex   Weight   Pre-modified Rankin Scale   Left atrial dimension   Left ventricular ejection fraction Smoking   Hypertension   DM   Dyslipidaemia   History of prior stroke   CAD   CHF   CHA2DS2-VASc score   HASBLED score   creatinine   CrCl                                                                                                                                                  | 4 (M) |
| Kawabata_2019 | Cohort          | 1 | Japan   | 8.9 months | 1521                      | APIX DABI<br>EDOX RIVA | NVAF patients with DOAC prescription                              | Excessive prolongation of coagulation time                                                                                                                                                                                                                                                                                                                                                              | 4 (M) |
| Kim_2019      | Cohort          | 1 | Korea   | 7.8 months | 687 (403 receiving NOACs) | APIX DABI<br>RIVA      | NVAF patients aged ≥ 80 years receiving warfarin or NOACs         | Stroke/SE   Major bleeding   Mortality                                                                                                                                                                                                                                                                                                                                                                  | 6 (M) |
| Kim_2018      | Cohort          | 1 | Korea   | 425 days   | 1068                      | APIX DABI<br>RIVA      | AF patients administered NOAC during study period                 | Stroke/SE   Major and non-major bleeding                                                                                                                                                                                                                                                                                                                                                                | 5 (M) |
| Larock_2014   | Cross-sectional | 1 | Belgium | N/A        | 69                        | DABI RIVA              | Patients taking dabigatran or rivaroxaban                         | Stroke/TIA   DVT/PE   Recurrent atrial thrombus   Non-major bleeding (epistaxis)   Bleeding (melena, hematemesis)   Bleeding (Anaemia)   Bleeding (gynaecological bleeding)   bleeding (gingival bleeding)   Bleeding (hemoptysis)   Major bleeding (haemorrhagic shock)   Major bleeding (death)   Bleeding ( Other)   Dyspepsia   Vomiting   Diarrhoea                                                | 4 (M) |
| Leblanc_2020  | Cross-sectional | 3 | Canada  | N/A        | 1681                      | APIX DABI<br>EDOX RIVA | NVAF or atrial flutter patients aged ≥18 years                    | Creatinine   Previous bleed   Falling/falling-fear   bleeding risk   Comorbid conditions                                                                                                                                                                                                                                                                                                                | 5 (M) |
| Lee_2018      | Cross-sectional | 3 | Korea   | N/A        | 6274                      | APIX DABI<br>EDOX RIVA | N/A                                                               | Sex                                                                                                                                                                                                                                                                                                                                                                                                     | 4 (M) |
| Lee_2017      | Cohort          | 1 | Korea   | 1 year     | 1834 (844 dabigatran)     | DABI                   | AF patients on warfarin or dabigatran with CHA2DS2-VASc score ≥ 2 | Thromboembolism   Ischaemic stroke (new-onset stroke)   Ischaemic stroke ( embolic stroke)   Major bleeding   Gastrointestinal haemorrhage   Bleeding ( Mucosal bleeding)   Mortality (all-cause death)   Major and non-major death (any bleeding)   Non-major bleeding (minor bleeding)   Stroke/SE/major bleeding/death ( grouped outcome)  Stroke/systemic embolism/major bleeding (grouped outcome) | 7 (H) |

|                |                 |   |               |            |       |                                      |                                                                                                                                            |                                                                                                                                                                        |       |
|----------------|-----------------|---|---------------|------------|-------|--------------------------------------|--------------------------------------------------------------------------------------------------------------------------------------------|------------------------------------------------------------------------------------------------------------------------------------------------------------------------|-------|
| Lee_2018       | Cohort          | 1 | Not recorded  | 1 year     | 2208  | RIVA                                 | NVAF patients                                                                                                                              | Major bleeding                                                                                                                                                         | 5 (M) |
| Lee_2019       | Cohort          | 1 | Korea         | 118 months | 4325  | DOACs                                | NVAF patients on anticoagulants                                                                                                            | Thromboembolism   Major bleeding                                                                                                                                       | 4 (M) |
| Lee_2019       | Cohort          | 1 | Korea         | N/A        | 6268  | APIX DABI<br>EDOX RIVA               | AF patients prescribed DOACs                                                                                                               | Thromboembolism   Major bleeding                                                                                                                                       | 7 (H) |
| Lee_2020       | Cohort          | 1 | Korea         | 6.3 months | 3733  | APIX DABI<br>EDOX RIVA               | AF patients on anticoagulants                                                                                                              | Thromboembolism   Major bleeding                                                                                                                                       | 6 (M) |
|                |                 | 3 |               |            |       |                                      |                                                                                                                                            | Age   Sex   Height   Weight   DM   Hypertension   CHF   Prior thromboembolism   Serum creatinine                                                                       | 7 (H) |
| Lee_2019       | Cohort          | 1 | Korea         | 1.4 years  | 5196  | RIVA                                 | AF patients with CrCl $\geq$ 50ml/min naïve to rivaroxaban and warfarin                                                                    | Ischemic stroke   Intracranial haemorrhage   Gastrointestinal haemorrhage   Major bleeding   Mortality (all-cause)   Stroke/major bleeding/ death (grouped outcome)    | 6 (M) |
| Lee_2019       | Cohort          | 1 | Korea         | N/A        | 14013 | APIX DABI<br>EDOX RIVA               | AF patients with body weight $\leq$ 60kg treated with oral anticoagulants                                                                  | Ischemic stroke   Intracranial haemorrhage   Gastrointestinal haemorrhage   Major bleeding   Mortality   Stroke/ ICH/bleeding/ hospitalisation/death (grouped outcome) | 6 (M) |
| Lee_2019       | Cross-sectional | 3 | Korea         | N/A        | 3080  | APIX DABI<br>EDOX RIVA               | Patients prescribed NOAC for stroke prevention                                                                                             | Age   CrCl   Weight   Sex   History of minor bleeding   Hypertension   Stroke/TIA                                                                                      | 6 (M) |
| Leef_2020      | Cross-sectional | 3 | United States | N/A        | 5060  | DABI RIVA                            | Newly diagnosed NVAF patients seen in an outpatient setting within 90 days following AF diagnosis and prescribed a DOAC within this period | Age   Sex   Ethnicity   CHA2DS2-VASc score   CHADS2   Charlson comorbidity index   CHF   DM   Hypertension   Stroke/TIA   Previous MI   eGFR                           | 4 (M) |
| McAlister_2018 | Cohort          | 3 | Canada        | N/A        | 6658  | APIX DABI<br>RIVA                    | NVAF patients with a first DOAC diagnosis 2010-2015                                                                                        | Age   Sex   CPCSSN comorbidity   Non-CPCSSN comorbidity   Hypertension   dm   dementia   Peripheral arterial disease   Cerebrovascular accident Previous heart failure | 9 (H) |
| Miyazaki_2020  | Cohort          | 3 | Japan         | N/A        | 316   | APIX DABI<br>EDOX RIVA               | AF diagnosed patients treated with DOACs                                                                                                   | HASBLED score                                                                                                                                                          | 7 (H) |
| Montrasio_2019 | Cohort          | 1 | Switzerland   | 2.96 years | 3267  | apixaban   unclear which other DOACs | AF patients on oral anticoagulants                                                                                                         | MI/cardiac death/ischemic stroke/systemic embolism (grouped outcome)   Major and non-major bleeding                                                                    | 7 (H) |
|                |                 | 3 |               |            |       |                                      |                                                                                                                                            | Coronary heart failure   Coronary artery disease   CKD   Age   Sex   Weight   CHA2DS2-VASc score                                                                       | 7 (H) |

|                |                 |   |               |             |       |                        |                                                                                                                             |                                                                                                                                                                                                              |       |
|----------------|-----------------|---|---------------|-------------|-------|------------------------|-----------------------------------------------------------------------------------------------------------------------------|--------------------------------------------------------------------------------------------------------------------------------------------------------------------------------------------------------------|-------|
| Moudallel_2018 | Cohort          | 1 | Belgium       | N/A         | 777   | APIX DABI<br>RIVA      | Patients aged ≥ 60 years admitted to study hospital in 2016 with at least one intake of dabigatran, rivaroxaban or apixaban | Major and non-major bleeding   Thromboembolic events                                                                                                                                                         | 5 (M) |
|                |                 | 3 |               |             |       |                        |                                                                                                                             | Physician speciality   Apixaban                                                                                                                                                                              | 6 (M) |
| Murata_2019    | Cohort          | 1 | Japan         | 39.3 months | 1658  | APIX DABI<br>EDOX RIVA | NVAF diagnosed patients using any anticoagulant for stroke prophylaxis                                                      | Stroke/SE   Major bleeding   Mortality   stroke/SE/major bleeding/death (grouped outcome)                                                                                                                    | 9 (H) |
|                |                 | 3 |               |             |       |                        |                                                                                                                             | Age   Sex   Height   Weight   High alcohol use   Hypertension   DM   Previous heart failure   Stroke/TIA   Vascular disease   History of major bleeding   CHA2DS2-VASc score   CHADS2   HASBLED score   CrCl | 7 (H) |
| Navarro_2019   | Cohort          | 1 | Spain         | 20.2 months | 2494  | APIX DABI<br>EDOX RIVA | NVAF patients receiving DOAC for stroke prevention and SE                                                                   | Mortality   Ischaemic stroke   Major bleeding   Intracranial haemorrhage                                                                                                                                     | 6 (M) |
| Okumura_2017   | Cross-sectional | 3 | Japan         | N/A         | 3266  | APIX DABI<br>EDOX RIVA | AF patients aged ≥ 20 years enrolled in the registry receiving warfarin or DOAC for stroke prophylaxis                      | Age   Sex   Weight   Current alcohol use   CHADS2   CrCl                                                                                                                                                     | 5 (M) |
| Ortiz_2018     | Cross-sectional | 3 | Spain         | N/A         | 530   | APIX DABI<br>RIVA      | Adult Spanish AF patients on anticoagulant                                                                                  | Age   Weight CHADS2   CHA2DS2-VASc score   Charlson comorbidity index   hypertrophic cardiomyopathy   Valve disease                                                                                          | 6 (M) |
| Pharithi_2019  | Cross-sectional | 3 | Ireland       | N/A         | 348   | APIX DABI<br>RIVA      | AF patients consecutively prescribed NOACs for primary prevention of stroke with or without planned cardioversion           | Anaemia/reduced haemoglobin   Renal function   Previous bleed                                                                                                                                                | 4 (M) |
| Rangnekar_2019 | Cross-sectional | 3 | Australia     | N/A         | 115   | DOAC                   | Patients presenting to the emergency department with a primary diagnosis of AF                                              | Age   Sex   Hypertension   CHF   DM                                                                                                                                                                          | 5 (M) |
| Salameh_2020   | Cohort          | 1 | Israel        | 5 years     | 27765 | APIX                   | All CHS adult members aged ≥ 40 years with pre-existing diagnoses of NVAF who are new users of apixaban                     | Major bleeding   Gastrointestinal haemorrhage   Intracranial haemorrhage   Stroke/SE                                                                                                                         | 8 (H) |
| Sanghai_2020   | Cross-sectional | 3 | United States | N/A         | 1064  | APIX DABI<br>EDOX RIVA | Ambulatory AF patients aged ≥ 65 years with CHA2DS2VASc score of at least 2                                                 | Age   Frailty   Renal function   CHA2DS2-VASc score   Cognitive impairment   Social isolation   Visual impairment   Hearing impairment   Elevated depressive symptoms                                        | 5 (M) |
| Sato_2018      | Cross-sectional | 1 | Japan         | N/A         | 2272  | APIX DABI<br>EDOX RIVA | Patients prescribed DOAC for AF                                                                                             | Mortality   Major bleeding   Intracranial haemorrhage   Gastrointestinal                                                                                                                                     | 3 (L) |



|                |                 |   |               |             |      |                     |                                                                                                      |                                                                                                                                                                                                                                                                                                          |       |
|----------------|-----------------|---|---------------|-------------|------|---------------------|------------------------------------------------------------------------------------------------------|----------------------------------------------------------------------------------------------------------------------------------------------------------------------------------------------------------------------------------------------------------------------------------------------------------|-------|
|                |                 |   |               |             |      |                     |                                                                                                      | haemorrhage   Stroke/SE   Ischemic stroke   Haemorrhagic stroke                                                                                                                                                                                                                                          |       |
|                |                 | 3 |               |             |      |                     |                                                                                                      | Age   Sex   Weight   Creatinine   CHADS2   HASBLED score                                                                                                                                                                                                                                                 | 3 (L) |
| Shamiss_2019   | Cross-sectional | 3 | Not recorded  | N/A         | 629  | APIX DABI RIVA      | Patients at an AF clinic prescribed low dose DOAC                                                    | Age                                                                                                                                                                                                                                                                                                      | 3 (L) |
| Shinohara_2019 | Cohort          | 1 | Japan         | 33.1 months | 354  | APIX DABI EDOX RIVA | AF patients aged > 80 years with non-severe frailty treated with OACs                                | Major bleeding   Non-major bleeding   Ischemic stroke   SE                                                                                                                                                                                                                                               | 6 (M) |
|                |                 | 3 |               |             |      |                     |                                                                                                      | Age   Sex   Weight   Frailty   CrCl   CHADS2   HASBLED score                                                                                                                                                                                                                                             | 6 (M) |
| Shrestha_2018  | Cohort          | 1 | United States | 12 months   | 388  | APIXDABI EDOX RIVA  | Adult NVAF patients aged ≥ 18 years with ≥ 1 pharmacy claim for apixaban, rivaroxaban, or dabigatran | Major bleeding   Ischemic stroke                                                                                                                                                                                                                                                                         | 6 (M) |
|                |                 | 3 |               |             |      |                     |                                                                                                      | Age   Sex   Weight   Smoking   Charlson comorbidity index   CHA2DS2-VASc score   CHADS2   GI bleeding   Intracranial haemorrhage   History of prior stroke   Renal disease   Renal function                                                                                                              | 7 (H) |
| Steinberg_2016 | Cohort          | 1 | United States | 0.99 years  | 5738 | APIX DABI RIVA      | Patients treated with NOAC for stroke prevention                                                     | Mortality   Stroke/TIA/SE   Myocardial infarction   Hospitalisation (first all-cause hospitalisation; first CV hospitalisation; first bleeding hospitalisation and First nonbleeding, non-CV hospitalization)   First major bleeding   Major bleeding (First bleeding hospitalization or major bleeding) | 6 (M) |
|                |                 | 3 |               |             |      |                     |                                                                                                      | Age   Sex   Ethnicity   Weight   CrCl   CHA2DS2-VASc score   ORBIT bleeding score   Left ventricular ejection fraction   CAD   Cerebrovascular accident   CHF   GI bleeding                                                                                                                              | 7 (H) |
| Steinberg_2018 | Cohort          | 1 | United States | 1 years     | 7925 | APIX DABI EDOX RIVA | Patients treated with NOACs who had follow-up data available                                         | Stroke/TIA/SE   Myocardial infarction   Mortality   Stroke SE/TIA/MI/Death grouped outcomes)   Major bleeding Hospitalisation (bleeding)                                                                                                                                                                 | 6 (M) |
|                |                 | 3 |               |             |      |                     |                                                                                                      | Age   Sex   Ethnicity   Frailty   Stroke/TIA   GI bleeding   CHA2DS2-VASc score   ORBIT bleeding score   Left ventricular ejection fraction   CrCl                                                                                                                                                       | 7 (H) |
| Stoll_2020     | Cohort          | 1 | Germany       | 3 months    | 254  | APIX DABI RIVA      | AF patients admitted with acute cerebral ischemia while taking oral Factor Xa inhibitors             | NIHSS score (on admission and at discharge)   Plasma level   Ischemic stroke   Large vessel occlusion   Mortality (in hospital and within 3 months)   Favorable outcomes (mRS) (mRS after 3 months 0-1 and 0-2 or idem                                                                                   | 5 (M) |
|                |                 | 3 |               |             |      |                     |                                                                                                      | Age   Sex   Weight   Hypertension   DM   Hypercholesterolaemia   History of prior stroke   Thrombectomy   Thrombolysis                                                                                                                                                                                   | 6 (M) |

|              |                 |   |               |                                                                                           |                                     |                        |                                                                                                                                                                                 |                                                                                                                                                                                                                                                                                                                                |       |
|--------------|-----------------|---|---------------|-------------------------------------------------------------------------------------------|-------------------------------------|------------------------|---------------------------------------------------------------------------------------------------------------------------------------------------------------------------------|--------------------------------------------------------------------------------------------------------------------------------------------------------------------------------------------------------------------------------------------------------------------------------------------------------------------------------|-------|
|              |                 |   |               |                                                                                           |                                     |                        |                                                                                                                                                                                 | Renal function   CHA2DS2-VASc score   Pre-modified Rankin scale                                                                                                                                                                                                                                                                |       |
| Suwa_2019    | Cohort          | 3 | Japan         | 17                                                                                        | 255                                 | APIX RIVA              | Outpatients with NVAF undergoing treatment with rivaroxaban or apixaban                                                                                                         | Age   Weight   CrCl   CHADS2   Hypertension   trough plasma concentration                                                                                                                                                                                                                                                      | 6 (M) |
| Suzuki_2018  | Cohort          | 1 | Japan         | N/A                                                                                       | 43                                  | APIX DABI<br>EDOX RIVA | NVAF patients treated with a DOAC before the onset of ICH and then admitted to study hospital for ICH                                                                           | Stroke (GCS score on admission; NIHSS Score and mRD score 0-2 at discharge)   Mortality                                                                                                                                                                                                                                        | 5 (M) |
|              |                 | 3 |               |                                                                                           |                                     |                        |                                                                                                                                                                                 | Age   Sex   Weight   Smoking   Alcohol intake   Modified Rankin score   Hypertension   DM   Dyslipidemia   Ischemic stroke   Haemorrhagic stroke   CAD   CHF   CHADS2   CHA2DS2-VASc score   HASBLED score   prothrombin time-international normalized ratio   activated partial thromboplastin time   Serum creatinine   CrCl | 6 (M) |
| Tavares_2020 | Cohort          | 1 | Portugal      | 90 days                                                                                   | 156 patients (73 treated with DOAC) | APIX DABI RIVA         | Patients who (1) had AIS according to the WHO criteria, (2) were on OAC and the rationale for anticoagulation was NVAF, and (3) information of NIHSS was available on admission | Ischemic stroke   Mortality                                                                                                                                                                                                                                                                                                    | 5 (M) |
| Tellor_2017  | Cross-sectional | 3 | United States | 495 days                                                                                  | 707                                 | APIX                   | NVAF patients aged ≥ 18 years who received at least 2 doses of apixaban for prevention of stroke and SE                                                                         | Age   Weight   Dialysis   Serum creatinine   CrCl   CHADS2   HASBLED score                                                                                                                                                                                                                                                     | 4 (M) |
| Umei_2017    | Cohort          | 1 | Japan         | 15.2 (8.4) months dabigatran   19.6 (7.6) months rivaroxaban   13.4 (7.5) months apixaban | 74                                  | APIX DABI RIVA         | NVAF patients who were newly treated with DOACs— dabigatran, rivaroxaban, or apixaban                                                                                           | Thromboembolism   Ischaemic stroke   TIA   SE   Major and non-major bleeding   Major bleeding   Non-major bleeding   Mortality                                                                                                                                                                                                 | 6 (M) |
|              |                 | 3 |               |                                                                                           |                                     |                        |                                                                                                                                                                                 | Age   Sex   Weight   Creatinine   CrCl   CHADS2   CHA2DS2-VASc score   HASBLED score   Prior stroke/TIA/thromboembolism   Previous bleed                                                                                                                                                                                       | 7 (H) |
| Vinding_2019 | Cohort          | 1 | Denmark       | N/A                                                                                       | 1626                                | DABI                   | NVAF patients who switched from VKA to dabigatran after it was approved                                                                                                         | Bleeding   Thromboembolic events   Mortality                                                                                                                                                                                                                                                                                   | 5 (M) |
|              |                 | 3 |               |                                                                                           |                                     |                        |                                                                                                                                                                                 | Age   Sex   High alcohol use   CHF   Hypertension   DM   prior stroke/TIA/thromboembolism   Peripheral arterial disease   Liver disease   CKD   Previous bleed   Cancer   Ischemic heart disease   COPD   CHA2DS2-VASc score   HASBLED score   eGFR                                                                            | 6 (M) |

|               |                 |   |               |            |       |                        |                                                                                                                                                 |                                                                                                                                                       |       |
|---------------|-----------------|---|---------------|------------|-------|------------------------|-------------------------------------------------------------------------------------------------------------------------------------------------|-------------------------------------------------------------------------------------------------------------------------------------------------------|-------|
| Woo_2019      | Cohort          | 1 | Korea         | N/A        | 120   | APIX DABI<br>EDOX RIVA | (1) patients with a history of TIA or ischemic stroke, (2) patients taking NOACs for NVAf, and (3) patients diagnosed with cardioembolic stroke | Major vessel occlusion                                                                                                                                | 6 (M) |
| Yagi_2020     | Cohort          | 1 | Japan         | 683 days   | 631   | RIVA                   | NVAf patients treated with rivaroxaban                                                                                                          | Mortality   Stroke/TIA/SE   Major bleeding   Non-major bleeding                                                                                       | 7 (H) |
|               |                 | 3 |               |            |       |                        |                                                                                                                                                 | Age   Sex   Weight   CrCl   Hypertension   Anaemia/reduced haemoglobin   CHF                                                                          | 7 (H) |
| Yao_2017      | Cohort          | 1 | United States | 3.6 months | 14865 | APIX DABI<br>RIVA      | NVAf patients with creatinine test results who initiated apixaban, dabigatran or rivaroxaban during study period                                | Stroke/SE   Major bleeding                                                                                                                            | 6 (M) |
| Yokoyama_2019 | Cohort          | 1 | Japan         | 12 months  | 85    | APIX DABI<br>EDOX RIVA | Acute ischemic stroke patients with nonvalvular atrial fibrillation and at least one cerebral microbleed                                        | Cerebral microbleed                                                                                                                                   | 5 (M) |
| Yu_2019       | Cross-sectional | 1 | Korea         | N/A        | 53649 | DOACs                  | AF patients treated with a NOAC                                                                                                                 | Stroke/SE   Major bleeding   Mortality                                                                                                                | 5 (M) |
|               |                 | 3 |               |            |       |                        |                                                                                                                                                 | Age   Sex   CHA2DS2-VASc score                                                                                                                        | 5 (M) |
| Zeymer_2020   | Cohort          | 1 | Germany       | 12 months  | 1349  | APIX                   | NVAf patients aged > 18 years                                                                                                                   | Ischemic stroke   Major bleeding   Mortality                                                                                                          | 6 (M) |
|               |                 | 3 |               |            |       |                        |                                                                                                                                                 | Age   Sex   CHA2DS2-VASc score   HASBLED score   History of major bleeding   History of minor bleeding   Severe bleeding under anticoagulation   eGFR | 6 (M) |

### S3. Supplementary figures

Figure 1. Forest plots illustrating odds ratio and 95% CI for factors with a null effect on DOAC underdosing. CI, confidence interval; DOAC, direct oral anticoagulant.

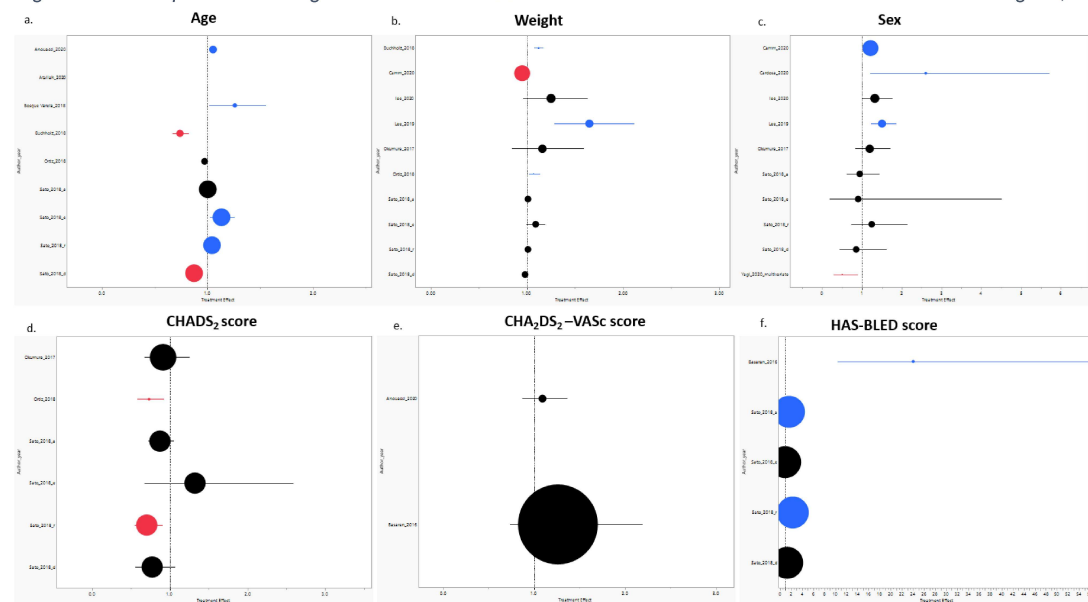

Figure 2. Forest plots illustrating odds ratio and 95% CI for factors with an inconclusive effect on DOAC underdosing. CI, confidence interval; DOAC, direct oral anticoagulant.

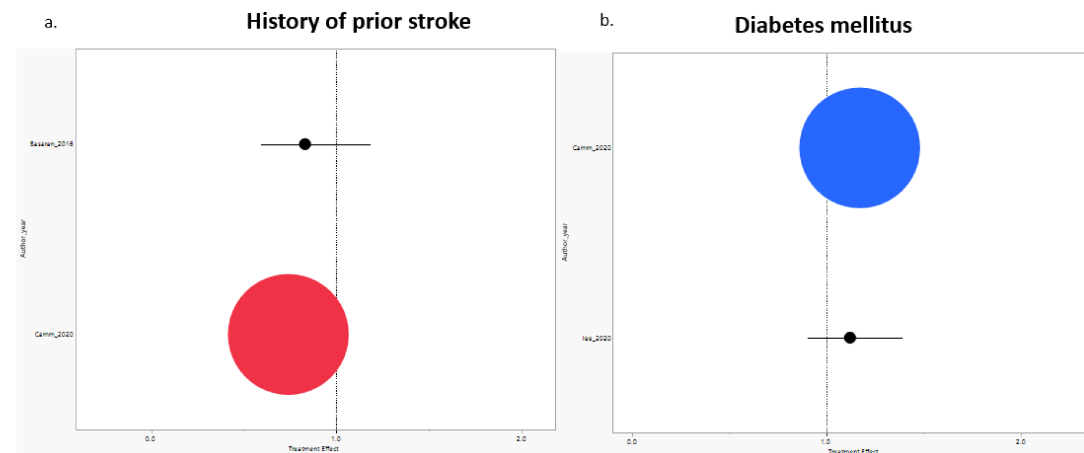

Figure 3. Forest plots illustrating odds ratio and 95% CI for factors with an inconclusive effect on DOAC overdosing. CI, confidence interval; DOAC, direct oral anticoagulant.

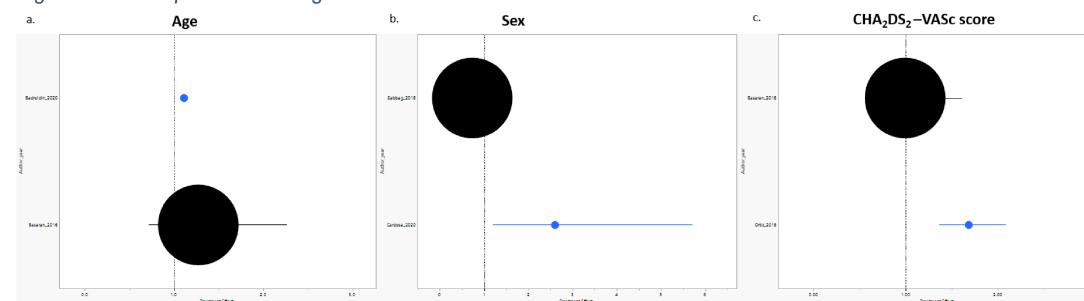

Figure 4. Forest plot displaying absolute risk difference of ischemic stroke and stroke/TIA events among patients given inappropriately low NOAC doses compared to patients given recommended NOAC doses. Data were extracted where available from all included studies and meta-analysis conducted using Stata 16.

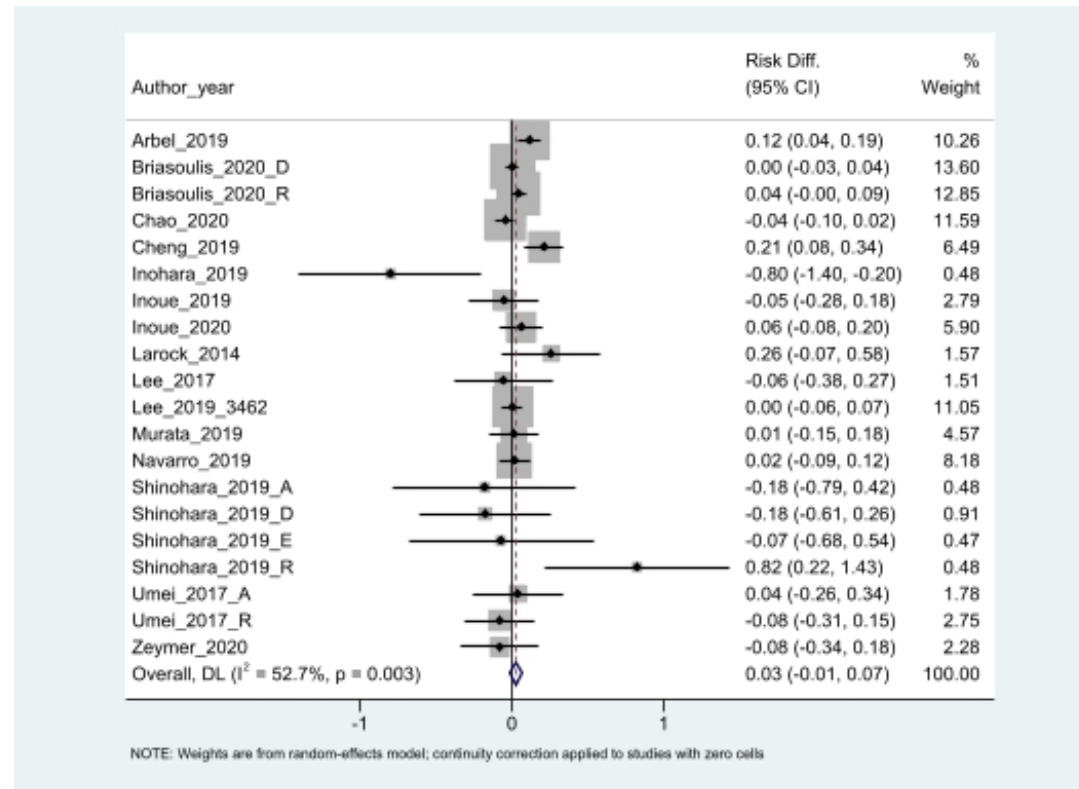

## S4. Supplementary analysis

Subgroup analysis was conducted for individual DOACs (apixaban, dabigatran, edoxaban, and rivaroxaban), and by geographical area (Asian and non-Asian studies).

### **Stroke outcomes of inappropriate dosing: subgroup analysis**

No difference was found in stroke outcomes between different NOACs (apixaban, dabigatran, edoxaban, and rivaroxaban) or geographical area (Asian and non-Asian studies).

### **Bleeding outcomes of inappropriate dosing: subgroup analysis**

There was variability with respect to the effect of underdosing on bleeding outcomes when comparing individual NOACs. Subgroup analysis between different NOACs (apixaban, dabigatran, edoxaban, and rivaroxaban) found an increased risk of major bleeding with underdosed apixaban (HR=1.35, 95% CI 1.02-1.77;  $p=0.035$ ). A null effect was found with underdosed dabigatran and rivaroxaban. Subgroup analysis for GIB found a null effect for all underdosed NOACs studied (dabigatran and rivaroxaban). There were insufficient studies to conduct subgroup analysis for ICH based on NOAC.

Overdosing produced the same results for all individually assessed NOACs: a null effect on major bleeding was found for overdosed dabigatran and rivaroxaban.

### **Mortality outcomes of inappropriate dosing: subgroup analysis**

In subgroup analysis, the increased risk of all-cause mortality associated with underdosing was not observed for all individual NOACs. Underdosing with apixaban was associated with an increased risk of all-cause mortality (HR=1.38, 95% CI 1.12-1.70;  $p=0.436$ ), while a null effect was associated with dabigatran (HR=1.33, 95% CI 0.94-1.88;  $p=0.103$ ) and rivaroxaban (HR=0.99, 95% CI 0.70-1.40;  $p=0.965$ ).

The increased risk of all-cause mortality was not observed across all geographical areas. Subgroup analysis by geographical area found an increased risk of all-cause mortality following underdosing for non-Asian studies (HR=1.45, 95% CI 1.30-1.63;  $p<0.001$ ) but a null effect for Asian studies (HR=1.05, 95% CI 0.76-1.44;  $p=0.771$ ).

There were insufficient studies to conduct subgroup analysis for mortality as an outcome of overdosing.

Table 13. Hazard ratio (95% CI) identified through subgroup analyses by individual NOAC and geography. N/A indicates that there were insufficient studies available to calculate a hazard ratio ( $n < 2$ ). Outcomes reported as defined in included studies. NOAC, non-vitamin K antagonist oral anticoagulant; IS, ischemic stroke; TIA, transient ischemic attack; SE, systemic embolism.

| Outcome                      |             | Subgroup analysis |                  |          |                  |                  |                  |
|------------------------------|-------------|-------------------|------------------|----------|------------------|------------------|------------------|
|                              |             | NOAC              |                  |          |                  | Geography        |                  |
|                              |             | Apixaban          | Dabigatran       | Edoxaban | Rivaroxaban      | Asian            | Non-Asian        |
| IS stroke/TIA                | Underdosing | N/A               | 1.12 (0.45-2.82) | N/A      | 1.22 (0.81-1.83) | 0.91 (0.72-1.15) | 1.27 (0.83-1.92) |
|                              | Overdosing  | N/A               | 1.13 (0.65-1.97) | N/A      | 0.54 (0.06-4.84) | N/A              | N/A              |
| Stroke/SE                    | Underdosing | 1.26 (0.88-1.81)  | N/A              | N/A      | 0.80 (0.62-1.02) | 0.99 (0.71-1.38) | 1.18 (0.65-2.14) |
|                              | Overdosing  | N/A               | N/A              | N/A      | N/A              | N/A              | N/A              |
| Major bleeding               | Underdosing | 1.35 (1.02-1.77)  | 0.96 (0.74-1.26) | N/A      | 1.02 (0.87-1.18) | 0.96 (0.78-1.17) | 1.16 (1.00-1.35) |
|                              | Overdosing  | N/A               | 1.32 (0.65-2.67) | N/A      | 0.9              | 2.63 (1.06-6.49) | 1.36 (0.99-1.86) |
| Intracranial haemorrhage     | Underdosing | N/A               | N/A              | N/A      | N/A              | 1.13 (0.83-1.55) | 1.27 (0.69-2.35) |
|                              | Overdosing  | N/A               | N/A              | N/A      | N/A              | N/A              | N/A              |
| Gastrointestinal haemorrhage | Underdosing | N/A               | 1.06 (0.76-1.50) | N/A      | 0.91 (0.65-1.29) | 0.76 (0.55-1.04) | 1.22 (0.96-1.56) |



|                            |             |                     |                  |     |                  |                     |                     |
|----------------------------|-------------|---------------------|------------------|-----|------------------|---------------------|---------------------|
|                            | Overdosing  | N/A                 | N/A              | N/A | N/A              | N/A                 | N/A                 |
| <b>All-cause mortality</b> | Underdosing | 1.38<br>(1.12-1.70) | 1.33 (0.94-1.88) | N/A | 0.99 (0.70-1.40) | 1.05<br>(0.76-1.44) | 1.45<br>(1.30-1.63) |
|                            | Overdosing  | N/A                 | N/A              | N/A | N/A              | N/A                 | N/A                 |

## S5. Additional study details

Table 14: Summary of statistical details for studies included in meta-analysis

| Reference # | Author, year     | Statistical analysis: regression              |                                                                                                                        |                                                         |
|-------------|------------------|-----------------------------------------------|------------------------------------------------------------------------------------------------------------------------|---------------------------------------------------------|
|             |                  | PH test reported                              | Competing risk analysis reported                                                                                       | Use of time dependent covariate for cumulative NOAC use |
| 10          | Steinberg, 2016  | NR, but cox PH model used                     | NR                                                                                                                     | Not assessed due to availability of dose criteria       |
| 12          | Yao, 2017        | Tested based on Schoenfeld residuals          | NR                                                                                                                     | NR                                                      |
| 13          | Steinberg, 2018  | NR, but cox PH model used                     | Included cause-specific hospitalization (cardiovascular, bleeding, or non-cardiovascular, non-bleeding), and mortality | NR                                                      |
| 14          | Lee, 2020        | Evaluated using log minus log survival curves | NR                                                                                                                     | Drug exposure was defined as a time-dependent variable  |
| 17          | Akcsusky, 2020   | Evaluated graphically                         | Used cause-specific hazard ratios to account for competing risks                                                       | NR                                                      |
| 20          | Arbel, 2019      | NR                                            | NR                                                                                                                     | NR                                                      |
| 21          | Briasoulis, 2020 | NR, but cox PH model used                     | NR                                                                                                                     | NR                                                      |
| 22          | Camm, 2020       | Tested and also assessed graphically          | NR                                                                                                                     | NR                                                      |
| 23          | Cho, 2020        | NR                                            | NR                                                                                                                     | NR                                                      |
| 24          | Ikeda, 2019      | NR, but cox PH model used                     | Cumulative incidence curves used                                                                                       | NR                                                      |

| Reference # | Author, year  | Statistical analysis: regression |                                  |                                                         |
|-------------|---------------|----------------------------------|----------------------------------|---------------------------------------------------------|
|             |               | PH test reported                 | Competing risk analysis reported | Use of time dependent covariate for cumulative NOAC use |
| 25          | Kim, 2019     | NR, but cox PH model used        | NR                               | NR                                                      |
| 26          | Lee, 2017     | NR, but cox PH model used        | Cumulative incidence curves used | NR                                                      |
| 27          | Lee, 2019     | NR, but cox PH model used        | Cumulative incidence curves used | NR                                                      |
| 28          | Murata, 2019  | NR, but cox PH model used        | Cumulative incidence curves used | NR                                                      |
| 29          | Salameh, 2020 | NR, but cox PH model used        | Cumulative incidence curves used | NR                                                      |

Abbreviations: NR, Not reported; PH, proportional hazards; NOAC, non-vitamin K oral anticoagulant

Table 15: Summary of dosing definition details for studies included in meta-analysis

| Reference # | Author, year     | NOAC dosing variable                                 |                                                                                           |                                                                                                                                                                                                                                                                                                         |
|-------------|------------------|------------------------------------------------------|-------------------------------------------------------------------------------------------|---------------------------------------------------------------------------------------------------------------------------------------------------------------------------------------------------------------------------------------------------------------------------------------------------------|
|             |                  | Type of dose patients received (initial/maintenance) | How was inappropriate dosing coded?                                                       | Dabigatran underdose definition                                                                                                                                                                                                                                                                         |
| 10          | Steinberg, 2016  | Maintenance                                          | Initial dosage                                                                            | 110mg (as not approved by FDA)                                                                                                                                                                                                                                                                          |
| 12          | Yao, 2017        | Maintenance (New users)                              | Dose prescribed and based on most recent SCr levels within 1 year of treatment initiation | 110mg (as not approved by FDA)                                                                                                                                                                                                                                                                          |
| 13          | Steinberg, 2018  | Maintenance                                          | Dose received                                                                             | 75mg                                                                                                                                                                                                                                                                                                    |
| 14          | Lee, 2020        | Maintenance                                          | Dose prescribed                                                                           | 110mg when criteria not met: condition for a reduced dose of dabigatran as an sCCr level $\geq 30$ and $< 50$ mL/min.                                                                                                                                                                                   |
| 17          | Akcsky, 2020     | Maintenance (New users)                              | Initial dosage                                                                            | Unclear                                                                                                                                                                                                                                                                                                 |
| 20          | Arbel, 2019      | Maintenance (New users)                              | Dosage dispensed immediately prior to outcome event or end of study                       | 110mg reduced dose, "The labeled recommendation for reduced-dose dabigatran is reduced renal function or an increased bleeding risk"                                                                                                                                                                    |
| 21          | Briasoulis, 2020 | Maintenance (New users)                              | Initial dosage based on most recent eGFR prior to treatment initiation                    | 75mg reduced dose "A reduced dose of 75 mg twice daily of dabigatran is recommended to decrease bleeding risk in patients with creatinine clearance (CrCl) 15–30 mL/minute, or co-administration of a strong P-glycoprotein [P-gp] inhibitor (e.g., dronedarone) in patients with CrCl 30–50 mL/minute" |
| 22          | Camm, 2020       | Maintenance                                          | Dose received                                                                             | "the European Medicines Agency (EMA) (2), the U.S. Food and Drug Administration (FDA) (3), or the Japanese Pharmaceuticals and Medical Devices Agency (PMDA) (4) were reviewed to define recommended dosing, underdosing, or overdosing."                                                               |
| 23          | Cho, 2020        | Maintenance                                          | Dose prescribed                                                                           | "The authors suggested that the 75 mg dose was suboptimal or patients were treated off-label and under-dosed with the 75 mg dose"                                                                                                                                                                       |
| 24          | Ikeda, 2019      | Maintenance (New users)                              | Prescribed dose                                                                           | N/A                                                                                                                                                                                                                                                                                                     |

| Reference # | Author, year  | NOAC dosing variable                                 |                                         |                                                                                                                                                                                                                                                                                                       |
|-------------|---------------|------------------------------------------------------|-----------------------------------------|-------------------------------------------------------------------------------------------------------------------------------------------------------------------------------------------------------------------------------------------------------------------------------------------------------|
|             |               | Type of dose patients received (initial/maintenance) | How was inappropriate dosing coded?     | Dabigatran underdose definition                                                                                                                                                                                                                                                                       |
| 25          | Kim, 2019     | Maintenance                                          | Dose received                           | No under-dosing                                                                                                                                                                                                                                                                                       |
| 26          | Lee, 2017     | Maintenance                                          | Dose used                               | "guideline-discordant use of dabigatran 110 mg" 110mg with none of following: old age (> 75 years old), renal dysfunction [glomerular filtrationrate (GFR) < 50 mL/min], or low body weight (<50 kg)                                                                                                  |
| 27          | Lee, 2019     | Maintenance                                          | Prescribed dose                         | 110mg                                                                                                                                                                                                                                                                                                 |
| 28          | Murata, 2019  | Maintenance                                          | Dose administered                       | "Of note, although under-dosing of dabigatran (to 110 mg, b.i.d.) was selected based on the rule previously described (namely, CrCl 30–50 mL/min, age ≥70 years; prior bleeding), rather than based on a standard dose, almost all physicians followed the defined rule for dabigatran under-dosing." |
| 29          | Salameh, 2020 | Maintenance (New users)                              | Dose received based on pharmacy records | N/A                                                                                                                                                                                                                                                                                                   |

Abbreviations: N/A, Not applicable; NOAC, non-vitamin K oral anticoagulant
